# Supplementary material
Source: MDPI journal article supplement (https://www.mdpi.com/1424-2818/15/4/533)

**Figure S1. Taxonomic composition of fungal communities in *A. nasatum* and *A. vulgare*. (A) Order. (B) Family.**

**A**

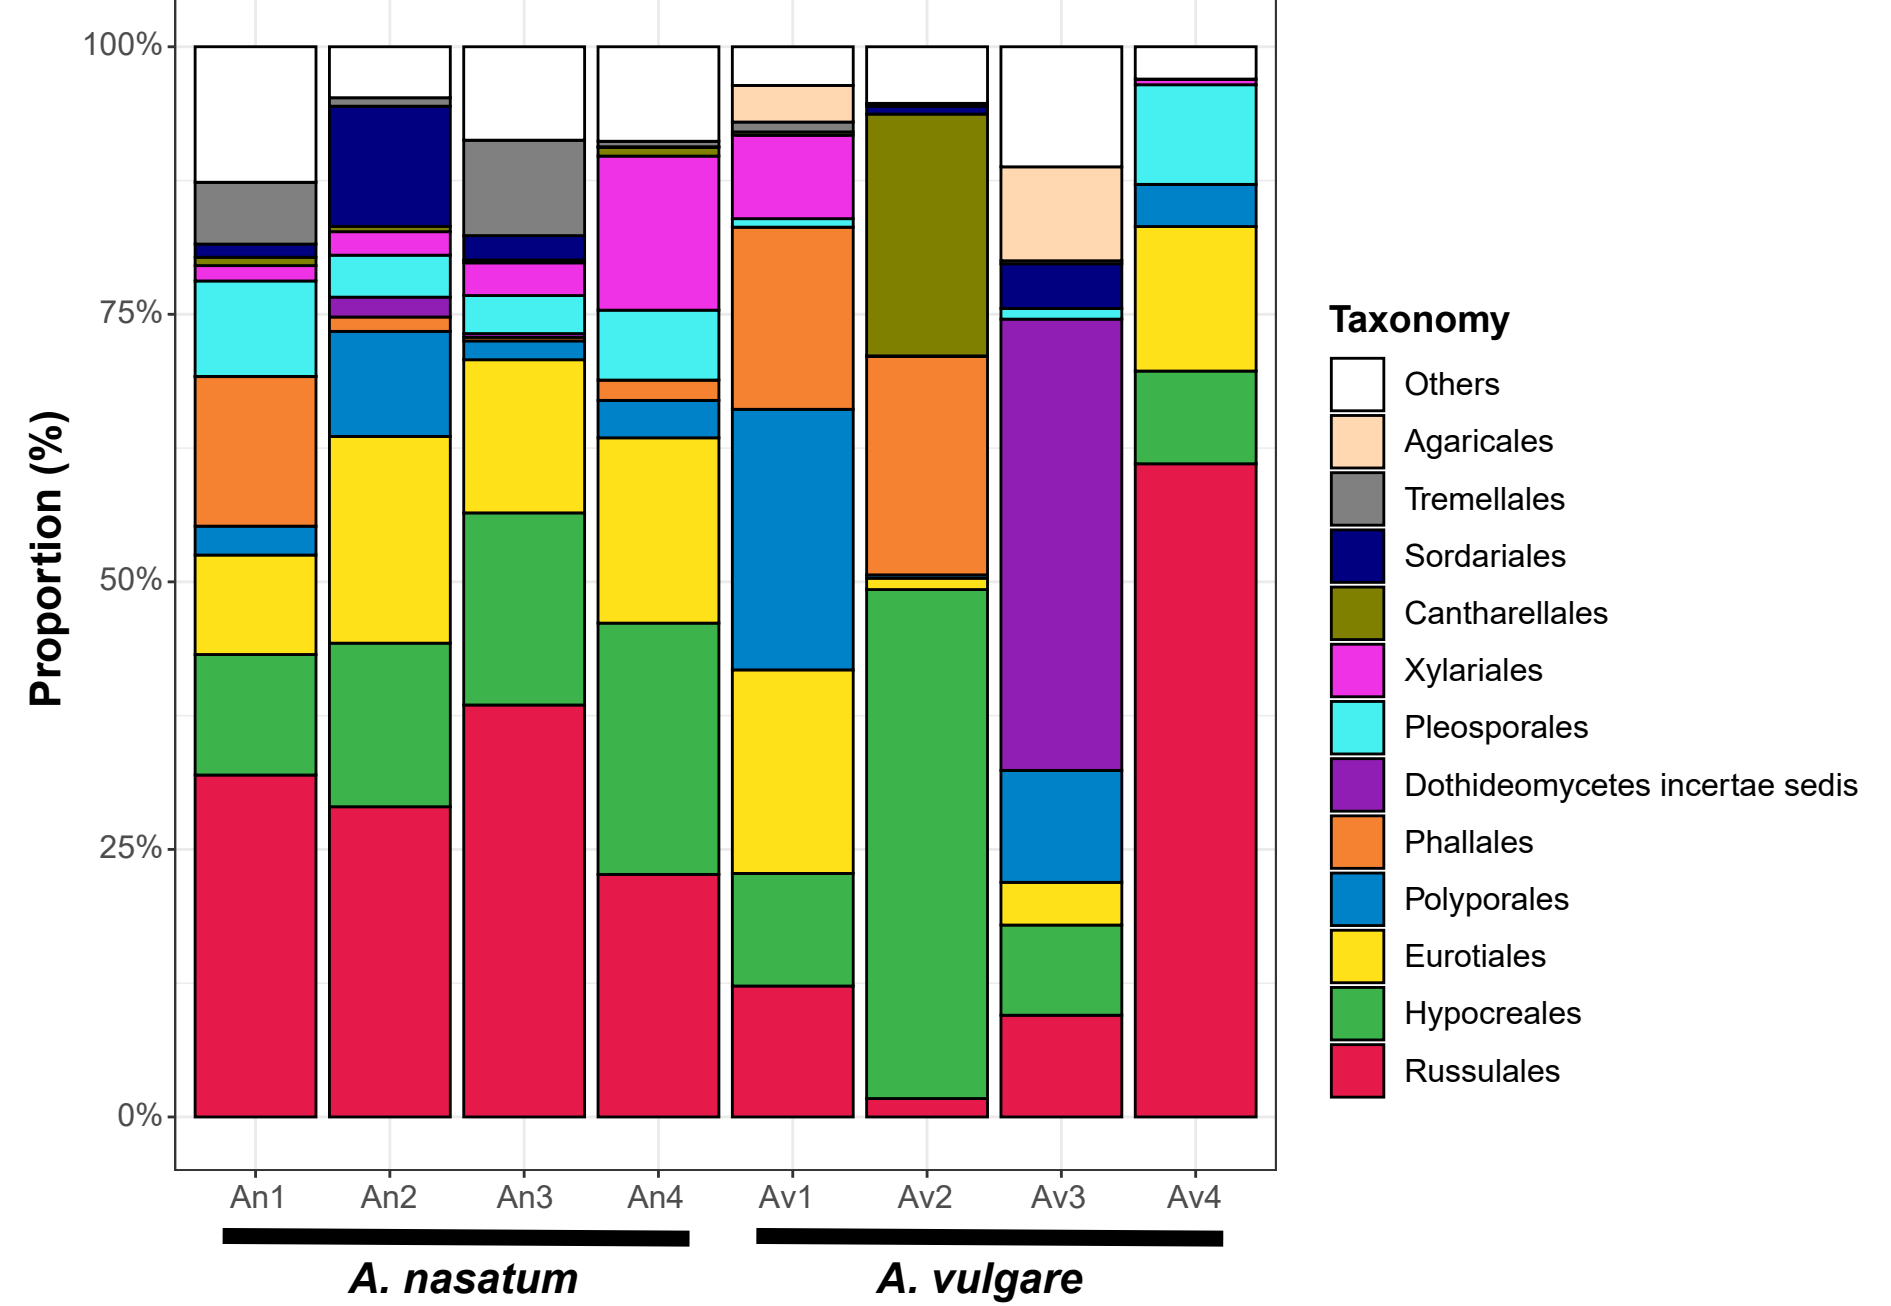

**B**

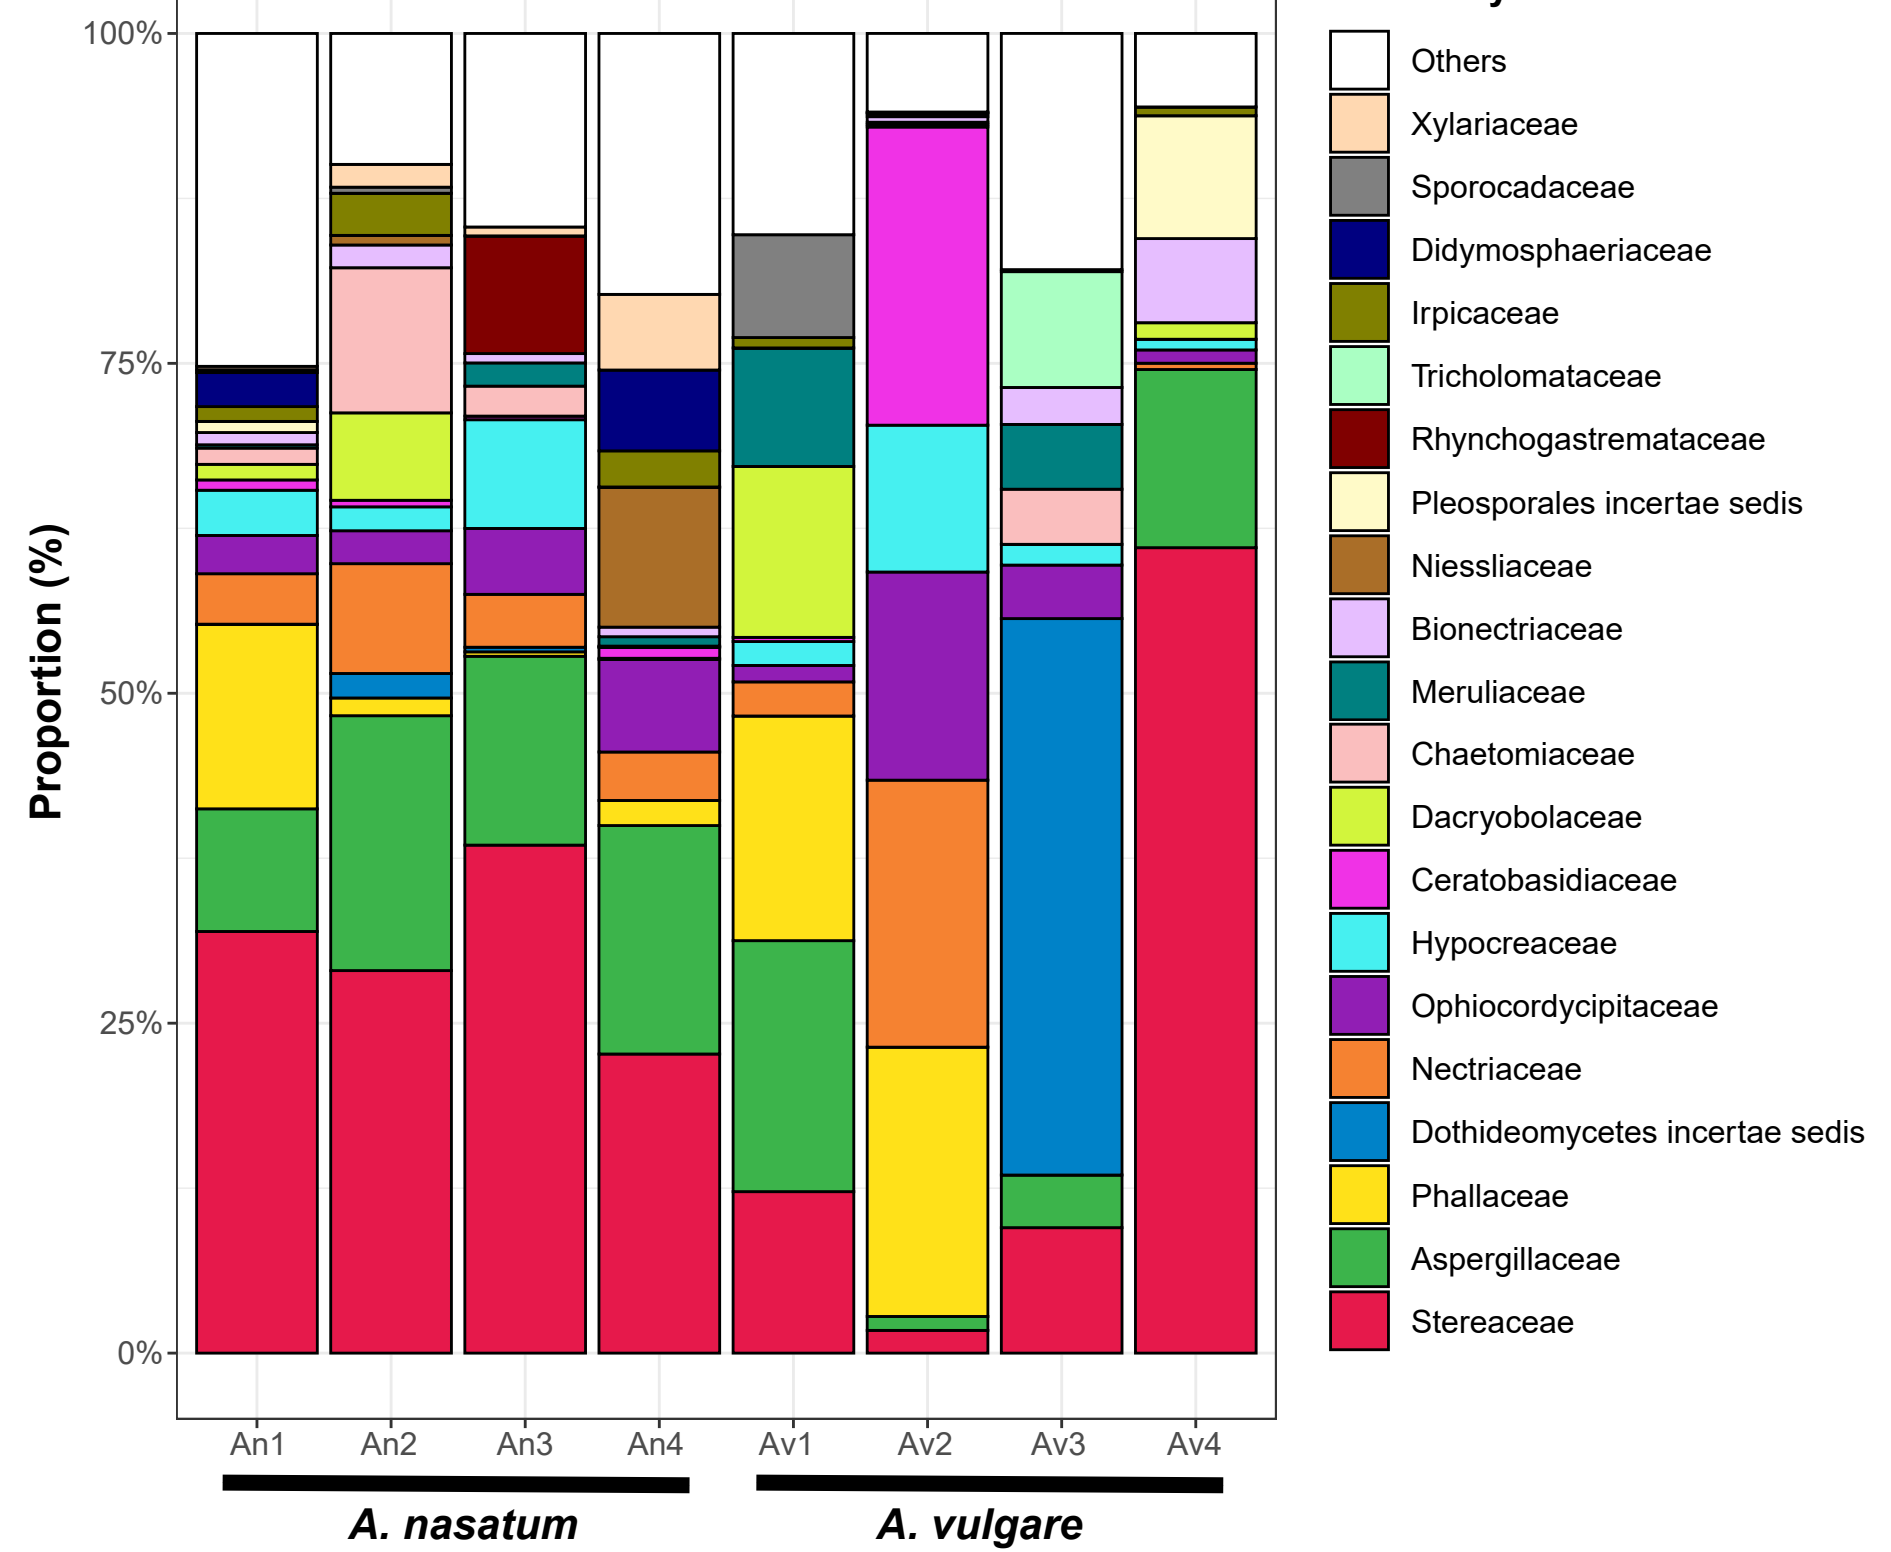

Supplement: s1 [file s1]
